# Supplementary material for: Transcriptomic Analysis Reveals Possible Influences of ABA on Secondary Metabolism of Pigments, Flavonoids and Antioxidants in Tomato Fruit during Ripening
Source: PLoS One. 2015 Jun 8;10(6):e0129598. doi: 10.1371/journal.pone.0129598 (PMC4460000; doi:10.1371/journal.pone.0129598)
Supplement: S4 Table — (XLS) [file pone.0129598.s008.xls]

## Sheet: Table S4
Table S4 The number of genes mapped to each KEGG pathway
Pathway ID	Description	Gene number	P value
10	Glycolysis / Gluconeogenesis	82	0.18766
20	Citrate cycle (TCA cycle)	29	0.0124724
30	Pentose phosphate pathway	20	0.353495
40	Pentose and glucuronate interconversions	24	0.978284
51	Fructose and mannose metabolism	20	0.696696		`
52	Galactose metabolism	19	0.767819
53	Ascorbate and aldarate metabolism	22	0.666776
61	Fatty acid biosynthesis	20	0.696696
62	Fatty acid elongation in mitochondria	2	0.638503
71	Fatty acid metabolism	21	0.151298
72	Synthesis and degradation of ketone bodies	2	0.638503
100	Steroid biosynthesis	18	0.834876
130	Ubiquinone and other terpenoid-quinone biosynthesis	22	0.858238
190	Oxidative phosphorylation	110	0.0294684
195	Photosynthesis	34	0.356186
196	Photosynthesis - antenna proteins	25	0.28107
230	Purine metabolism	84	0.837805
240	Pyrimidine metabolism	23	0.937439
250	Alanine, aspartate and glutamate metabolism	28	0.394819
260	Glycine, serine and threonine metabolism	29	0.875363
270	Cysteine and methionine metabolism	46	0.296687
280	Valine, leucine and isoleucine degradation	19	0.414972
290	Valine, leucine and isoleucine biosynthesis	15	0.454387
300	Lysine biosynthesis	9	0.869578
330	Arginine and proline metabolism	28	0.307813
340	Histidine metabolism	9	0.71644
350	Tyrosine metabolism	2	0.638503
351	1,1,1-Trichloro-2,2-bis(4-chlorophenyl)ethane (DDT)	1	1
360	Phenylalanine metabolism	35	0.954927
361	gamma-Hexachlorocyclohexane degradation	12	0.850794
380	Tryptophan metabolism	9	0.869578
400	Phenylalanine, tyrosine and tryptophan biosynthesis	18	0.0504022
410	beta-Alanine metabolism	1	0.492533
430	Taurine and hypotaurine metabolism	5	0.242551
440	Phosphonate and phosphinate metabolism	3	0.233113
450	Selenoamino acid metabolism	5	0.416722
460	Cyanoamino acid metabolism	8	0.469075
480	Glutathione metabolism	15	0.0600292
500	Starch and sucrose metabolism	52	0.95955
510	N-Glycan biosynthesis	33	0.585389
511	Other glycan degradation	7	0.781107
520	Amino sugar and nucleotide sugar metabolism	17	0.559385
521	Streptomycin biosynthesis	3	0.446185
531	Glycosaminoglycan degradation	1	1
540	Lipopolysaccharide biosynthesis	3	0.742489
550	Peptidoglycan biosynthesis	1	1
561	Glycerolipid metabolism	23	0.881025
562	Inositol phosphate metabolism	21	0.624733
563	Glycosylphosphatidylinositol(GPI)-anchor biosynthesis	10	1
564	Glycerophospholipid metabolism	22	0.923296
590	Arachidonic acid metabolism	1	1
591	Linoleic acid metabolism	6	0.503808
592	alpha-Linolenic acid metabolism	12	0.419227
600	Sphingolipid metabolism	6	0.719485
603	Glycosphingolipid biosynthesis - globo series	2	1
620	Pyruvate metabolism	17	0.433523
630	Glyoxylate and dicarboxylate metabolism	11	0.50627
632	Benzoate degradation via CoA ligation	1	0.492533
670	One carbon pool by folate	4	1
680	Methane metabolism	1	1
710	Carbon fixation in photosynthetic organisms	7	0.781107
730	Thiamine metabolism	4	0.816565
740	Riboflavin metabolism	4	0.552721
750	Vitamin B6 metabolism	4	0.816565
760	Nicotinate and nicotinamide metabolism	8	0.469075
770	Pantothenate and CoA biosynthesis	5	0.129837
780	Biotin metabolism	3	0.742489
785	Lipoic acid metabolism	3	1
790	Folate biosynthesis	4	0.816565
830	Retinol metabolism	1	0.492533
860	Porphyrin and chlorophyll metabolism	29	0.433822
900	Terpenoid backbone biosynthesis	20	0.462427
902	Monoterpenoid biosynthesis	2	1
904	Diterpenoid biosynthesis	8	0.654599
905	Brassinosteroid biosynthesis	4	0.552721
906	Carotenoid biosynthesis	26	0.614127
908	Zeatin biosynthesis	8	1
910	Nitrogen metabolism	9	0.242823
920	Sulfur metabolism	5	0.869333
940	Phenylpropanoid biosynthesis	13	0.881194
941	Flavonoid biosynthesis	9	0.71644
942	Anthocyanin biosynthesis	1	0.492533
944	Flavone and flavonol biosynthesis	2	1
960	Tropane, piperidine and pyridine alkaloid biosynthesis	2	1
970	Aminoacyl-tRNA biosynthesis	30	0.753998
1040	Biosynthesis of unsaturated fatty acids	9	0.869578
2010	ABC transporters	2	1
3010	Ribosome	199	6.04201e-06
3018	RNA degradation	48	0.722133
3020	RNA polymerase	2	1
3022	Basal transcription factors	27	0.896574
3030	DNA replication	26	0.93164
3040	Spliceosome	105	0.35075
3050	Proteasome	42	9.99291e-05
3060	Protein export	33	0.250048
3320	PPAR signaling pathway	3	0.742489
3410	Base excision repair	18	0.998413
3420	Nucleotide excision repair	21	0.83196
3430	Mismatch repair	7	1
3440	Homologous recombination	12	0.942372
3450	Non-homologous end-joining	3	0.742489
4010	MAPK signaling pathway	13	0.345075
4012	ErbB signaling pathway	3	0.446185
4020	Calcium signaling pathway	13	0.152984
4060	Cytokine-cytokine receptor interaction	1	1
4062	Chemokine signaling pathway	1	0.492533
4080	Neuroactive ligand-receptor interaction	2	0.638503
4110	Cell cycle	47	0.995832
4111	Cell cycle - yeast	19	0.862595
4112	Cell cycle - Caulobacter	10	0.300059
4113	Meiosis - yeast	11	0.813808
4115	p53 signaling pathway	15	0.454387
4120	Ubiquitin mediated proteolysis	54	0.0406493
4130	SNARE interactions in vesicular transport	28	0.232743
4140	Regulation of autophagy	9	0.540228
4142	Lysosome	28	0.490735
4144	Endocytosis	31	0.100959
4145	Phagosome	14	0.535353
4146	Peroxisome	18	0.266942
4150	mTOR signaling pathway	5	0.643794
4310	Wnt signaling pathway	11	0.359369
4330	Notch signaling pathway	2	0.638503
4340	Hedgehog signaling pathway	4	0.325039
4360	Axon guidance	1	0.492533
4530	Tight junction	1	1
4612	Antigen processing and presentation	3	0.233113
4621	NOD-like receptor signaling pathway	1	1
4622	RIG-I-like receptor signaling pathway	4	0.552721
4626	Plant-pathogen interaction	74	0.107215
4666	Fc gamma R-mediated phagocytosis	6	0.719485
4710	Circadian rhythm - mammal	1	1
4712	Circadian rhythm - plant	17	0.894152
4722	Neurotrophin signaling pathway	2	1
4810	Regulation of actin cytoskeleton	2	0.638503
4910	Insulin signaling pathway	11	0.813808
4962	Vasopressin-regulated water reabsorption	2	0.638503
5010	Alzheimer's disease	3	0.446185
5014	Amyotrophic lateral sclerosis (ALS)	2	0.638503
5020	Prion diseases	1	0.492533
5110	Vibrio cholerae infection	2	0.638503
5130	Pathogenic Escherichia coli infection	1	0.492533
5140	Leishmaniasis	1	1
5322	Systemic lupus erythematosus	31	0.0317212
5416	Viral myocarditis	2	0.326546
