# Supplementary material for: Transcriptomic Analysis Reveals Possible Influences of ABA on Secondary Metabolism of Pigments, Flavonoids and Antioxidants in Tomato Fruit during Ripening
Source: PLoS One. 2015 Jun 8;10(6):e0129598. doi: 10.1371/journal.pone.0129598 (PMC4460000; doi:10.1371/journal.pone.0129598)
Supplement: S11 Table — (XLS) [file pone.0129598.s015.xls]

## Sheet: Table S11
Table S11 KEGG pathway enrichment analysis of DEGs in response to exogenous ABA
Pathway ID	Pathway name	Gene list	Number of DEGs	P value	Regulation
196	Photosynthesis - antenna proteins	Solyc01g105030.2;Solyc01g105050.2;Solyc02g070940.1;Solyc02g070950.1;Solyc02g070990.1;Solyc02g071000.1;Solyc02g071010.1;Solyc02g071030.1;Solyc03g005770.1;Solyc03g115900.2;Solyc03g005760.1;Solyc06g069730.2;Solyc06g063370.2;Solyc07g022900.2;Solyc07g047850.2;Solyc07g063600.2;Solyc09g014520.2;Solyc10g006230.2;Solyc10g007690.2;Solyc12g011450.1;Solyc12g006140.1;Solyc12g011280.1	11	7.89072e-06	down
195	Photosynthesis	Solyc01g007380.1;Solyc01g007540.2;Solyc01g007410.2;Solyc02g024050.2;Solyc02g065400.2;Solyc02g062130.2;Solyc02g079950.2;Solyc02g090030.2;Solyc03g120640.2;Solyc03g005190.2;Solyc04g082010.1;Solyc05g007780.2;Solyc06g066640.2;Solyc06g082940.2;Solyc06g082950.2;Solyc06g083680.2;Solyc06g084050.2;Solyc06g054260.1;Solyc07g066150.1;Solyc07g066310.2;Solyc07g044860.2;Solyc07g054290.1;Solyc08g077050.2;Solyc08g…	10	0.00202554	up,down
521	Streptomycin biosynthesis	Solyc02g069010.2;Solyc04g054740.2;Solyc05g051850.2	1	0.301577	up,down
630	Glyoxylate and dicarboxylate metabolism	Solyc01g007330.2;Solyc02g063150.2;Solyc02g085950.2;Solyc02g086880.2;Solyc02g092530.2;Solyc03g034220.2;Solyc03g122130.2;Solyc03g122170.2;Solyc07g056540.2;Solyc07g052480.2;Solyc08g078490.2	2	0.356872	up,down
790	Folate biosynthesis	Solyc05g052920.2;Solyc06g083230.2;Solyc09g091100.2;Solyc10g079830.1	1	0.380341	up,down
4145	Phagosome	Solyc01g100380.2;Solyc02g087880.2;Solyc03g025730.2;Solyc03g118040.2;Solyc03g118760.2;Solyc04g077020.2;Solyc04g081490.2;Solyc06g005910.2;Solyc06g035970.2;Solyc08g006890.2;Solyc10g080940.1;Solyc10g085020.1;Solyc10g086760.1	2	0.440094	up,down
360	Phenylalanine metabolism	Solyc01g006290.2;Solyc01g096670.2;Solyc01g105070.2;Solyc01g107910.2;Solyc02g064970.2;Solyc02g087190.1;Solyc02g090450.2;Solyc02g094180.2;Solyc02g080530.2;Solyc02g092580.2;Solyc02g093230.2;Solyc02g093250.2;Solyc02g093270.2;Solyc03g006810.2;Solyc03g096040.2;Solyc03g044100.2;Solyc04g071890.2;Solyc04g071900.2;Solyc05g056170.2;Solyc05g047530.2;Solyc05g052280.2;Solyc06g050440.2;Solyc07g052550.1;Solyc07g…	4	0.543688	up,down
941	Flavonoid biosynthesis	Solyc02g083860.2;Solyc03g115220.2;Solyc05g010320.2;Solyc05g053550.2;Solyc08g080040.2;Solyc11g013110.1;Solyc12g088880.1	1	0.567244	up,down
511	Other glycan degradation	Solyc01g081610.2;Solyc02g083700.2;Solyc03g093440.2;Solyc05g054710.2;Solyc06g050930.2;Solyc06g068860.2;Solyc11g008810.1	1	0.567244	up,down
710	Carbon fixation in photosynthetic organisms	Solyc02g020940.2;Solyc04g009030.2;Solyc05g052600.2;Solyc08g076220.2;Solyc12g094640.1	1	0.567244	up,down
3410	Base excision repair	Solyc02g082120.2;Solyc02g021060.2;Solyc02g021100.2;Solyc03g116880.2;Solyc03g117510.2;Solyc03g117970.2;Solyc03g033530.2;Solyc04g080470.2;Solyc04g016530.2;Solyc04g079990.2;Solyc05g006120.2;Solyc05g010800.2;Solyc06g066780.2;Solyc06g073400.2;Solyc08g074740.2;Solyc09g018850.2;Solyc10g080560.1	2	0.586594	up,down
908	Zeatin biosynthesis	Solyc01g080150.2;Solyc02g085880.1;Solyc04g007240.1;Solyc04g016430.2;Solyc04g080820.2;Solyc11g066960.1;Solyc12g008900.1;Solyc12g014190.1	1	0.616055	up,down
380	Tryptophan metabolism	Solyc02g077620.1;Solyc02g082760.2;Solyc04g082460.2;Solyc04g005370.2;Solyc06g065630.2;Solyc08g074410.2;Solyc12g095850.1	1	0.616055	up,down
460	Cyanoamino acid metabolism	Solyc01g010390.2;Solyc02g080300.2;Solyc02g080310.2;Solyc03g119080.2;Solyc04g015340.2;Solyc06g005970.2;Solyc06g076780.2;Solyc11g068730.1	1	0.616055	up,down
910	Nitrogen metabolism	Solyc01g108630.2;Solyc03g063560.2;Solyc05g005490.2;Solyc09g009830.2;Solyc09g010970.2;Solyc09g090430.2;Solyc10g050890.1;Solyc11g013810.1;Solyc11g069640.1	1	0.659363	up,down
4910	Insulin signaling pathway	Solyc02g088800.1;Solyc03g111320.1;Solyc03g115070.1;Solyc03g122240.2;Solyc05g024340.1;Solyc05g054820.1;Solyc06g062990.1;Solyc08g069100.1;Solyc09g005830.1;Solyc09g005840.1;Solyc12g096370.1	1	0.731879	up,down
361	gamma-Hexachlorocyclohexane degradation	Solyc01g094750.2;Solyc01g096280.1;Solyc02g092860.2;Solyc03g114940.2;Solyc04g008260.2;Solyc04g015150.2;Solyc05g043430.2;Solyc05g055400.2;Solyc06g076800.2;Solyc06g071820.2;Solyc09g092590.1;Solyc10g078280.2	1	0.762126	up,down
4020	Calcium signaling pathway	Solyc01g010760.2;Solyc01g108340.2;Solyc01g008950.2;Solyc01g087070.2;Solyc02g067460.2;Solyc02g090480.2;Solyc03g058920.2;Solyc03g098050.2;Solyc07g006830.2;Solyc07g053830.2;Solyc10g081170.1;Solyc11g072240.1;Solyc12g099990.1	1	0.788962	up,down
250	Alanine, aspartate and glutamate metabolism	Solyc01g068210.2;Solyc01g080280.2;Solyc01g007940.2;Solyc01g087870.2;Solyc03g083440.2;Solyc03g094010.2;Solyc04g054310.2;Solyc04g025530.2;Solyc04g076320.2;Solyc05g012270.2;Solyc05g013380.2;Solyc06g033860.1;Solyc06g071000.2;Solyc06g007180.2;Solyc06g063090.2;Solyc07g041280.2;Solyc08g041870.2;Solyc08g062190.2;Solyc08g068330.2;Solyc09g090700.1;Solyc10g076250.1;Solyc10g078550.1;Solyc11g011380.1;Solyc11g…	2	0.808298	up,down
4130	SNARE interactions in vesicular transport	Solyc01g100170.2;Solyc01g006950.2;Solyc03g115470.2;Solyc03g115760.2;Solyc03g122090.2;Solyc04g071730.2;Solyc04g074940.2;Solyc06g008520.2;Solyc06g065740.2;Solyc06g069570.2;Solyc06g053760.2;Solyc06g063030.2;Solyc06g065950.2;Solyc06g074250.2;Solyc07g005200.2;Solyc07g047720.2;Solyc07g065030.2;Solyc08g005200.2;Solyc08g067910.2;Solyc09g089630.2;Solyc09g090860.2;Solyc10g081580.1;Solyc10g081850.1;Solyc10g…	2	0.808298	up,down
3022	Basal transcription factors	Solyc01g028930.2;Solyc02g078300.2;Solyc02g078440.2;Solyc02g085470.2;Solyc03g119790.2;Solyc03g119780.2;Solyc04g010090.2;Solyc04g076580.2;Solyc04g054700.2;Solyc05g010570.2;Solyc05g018120.1;Solyc06g065700.2;Solyc06g064890.2;Solyc06g071450.2;Solyc06g076390.2;Solyc07g006820.2;Solyc07g065040.2;Solyc07g032090.2;Solyc09g009680.2;Solyc10g005900.2;Solyc10g006100.2;Solyc10g054400.1;Solyc10g079360.1;Solyc11g…	2	0.824909	up,down
4115	p53 signaling pathway	Solyc01g103220.2;Solyc01g006190.2;Solyc01g067360.2;Solyc01g096020.2;Solyc03g083270.2;Solyc05g050580.2;Solyc06g051980.2;Solyc06g054540.2;Solyc06g084510.2;Solyc07g063120.2;Solyc09g008430.2;Solyc10g009420.2;Solyc10g044910.1;Solyc11g042420.1;Solyc12g005950.1	1	0.833896	up,down
290	Valine, leucine and isoleucine biosynthesis	Solyc01g080810.2;Solyc02g065300.1;Solyc03g005730.2;Solyc03g044330.1;Solyc05g009030.2;Solyc05g053540.2;Solyc06g053400.2;Solyc06g060790.1;Solyc07g053280.2;Solyc08g014130.2;Solyc09g007540.2;Solyc11g008780.1;Solyc11g012140.1;Solyc12g010840.1;Solyc12g043020.1	1	0.833896	up,down
4142	Lysosome	Solyc01g109640.2;Solyc01g100820.2;Solyc02g085240.2;Solyc02g069090.2;Solyc02g069110.2;Solyc03g005120.2;Solyc03g096000.2;Solyc03g119270.1;Solyc04g025870.2;Solyc04g076230.2;Solyc04g082490.2;Solyc05g005780.2;Solyc05g026130.2;Solyc05g013340.2;Solyc05g052510.2;Solyc06g043030.2;Solyc06g051310.2;Solyc06g074850.2;Solyc06g017860.1;Solyc06g083030.2;Solyc07g041900.2;Solyc08g075310.2;Solyc08g065610.2;Solyc08g…	2	0.840213	up,down
860	Porphyrin and chlorophyll metabolism	Solyc01g079090.2;Solyc01g112290.2;Solyc01g008930.2;Solyc01g102410.2;Solyc03g044470.2;Solyc03g111360.2;Solyc03g115980.1;Solyc03g118240.2;Solyc04g015490.2;Solyc04g009200.2;Solyc04g015750.2;Solyc04g076870.2;Solyc05g032660.2;Solyc06g050980.2;Solyc06g053980.2;Solyc06g060310.2;Solyc07g024000.2;Solyc07g066470.2;Solyc08g069030.2;Solyc08g065480.2;Solyc09g014760.2;Solyc10g006900.2;Solyc10g008740.2;Solyc10g…	2	0.854293	up,down
20	Citrate cycle (TCA cycle)	Solyc01g005560.2;Solyc01g007910.2;Solyc01g073740.2;Solyc01g101040.2;Solyc01g059880.2;Solyc01g106480.2;Solyc02g086610.2;Solyc02g093680.2;Solyc02g063490.2;Solyc02g085350.2;Solyc03g115990.1;Solyc04g011350.2;Solyc04g055020.1;Solyc05g005160.2;Solyc06g083790.2;Solyc07g052350.2;Solyc07g062650.2;Solyc07g064800.2;Solyc07g055840.2;Solyc08g077920.2;Solyc08g077930.2;Solyc09g075450.2;Solyc09g090140.2;Solyc10g…	2	0.854293	up,down
520	Amino sugar and nucleotide sugar metabolism	Solyc00g011890.2;Solyc01g009420.2;Solyc02g068530.2;Solyc02g030230.2;Solyc02g069580.2;Solyc04g058070.2;Solyc04g072000.2;Solyc05g018520.2;Solyc06g074670.2;Solyc07g005100.2;Solyc07g062130.2;Solyc08g077270.2;Solyc08g080140.2;Solyc08g063080.2;Solyc09g009780.2;Solyc10g081440.1;Solyc11g066720.1	1	0.869265	up,down
620	Pyruvate metabolism	Solyc01g080460.2;Solyc01g094200.2;Solyc02g080630.2;Solyc03g111130.1;Solyc03g111140.2;Solyc04g006970.2;Solyc05g050120.2;Solyc07g055060.2;Solyc07g064810.2;Solyc08g013860.2;Solyc08g066360.2;Solyc10g007290.2;Solyc11g069040.2;Solyc12g008430.1;Solyc12g044600.2;Solyc12g007310.1;Solyc12g014250.1	1	0.869265	up,down
190	Oxidative phosphorylation	Solyc00g021630.1;Solyc00g013130.2;Solyc00g013140.1;Solyc00g013180.1;Solyc00g019740.1;Solyc00g094530.1;Solyc01g007290.1;Solyc01g087120.2;Solyc01g088570.2;Solyc01g111760.2;Solyc01g007300.1;Solyc01g007310.2;Solyc01g007320.2;Solyc01g022750.2;Solyc01g073690.2;Solyc01g080860.2;Solyc01g106430.2;Solyc01g109620.2;Solyc01g110120.2;Solyc02g068450.2;Solyc02g079170.2;Solyc02g080540.1;Solyc02g084360.2;Solyc02g…	9	0.871963	up,down
4111	Cell cycle - yeast	Solyc01g011340.2;Solyc01g005950.2;Solyc01g034020.2;Solyc01g073650.2;Solyc02g083600.2;Solyc02g087980.2;Solyc03g093250.1;Solyc03g121410.2;Solyc05g009600.2;Solyc05g006590.2;Solyc06g069180.2;Solyc07g049680.2;Solyc08g075960.2;Solyc08g005970.2;Solyc10g079730.1;Solyc11g011370.1;Solyc12g044800.1;Solyc12g096060.1	1	0.884017	up,down
4626	Plant-pathogen interaction	Solyc01g005440.2;Solyc01g008440.2;Solyc01g095100.2;Solyc01g104970.2;Solyc01g112250.2;Solyc01g010020.2;Solyc01g104530.2;Solyc02g037540.1;Solyc02g070890.2;Solyc02g091500.1;Solyc02g094000.1;Solyc02g081050.2;Solyc02g088560.2;Solyc02g090810.2;Solyc03g083520.2;Solyc03g097100.1;Solyc03g112150.1;Solyc03g113390.2;Solyc03g117980.2;Solyc03g118540.2;Solyc03g118810.1;Solyc03g031670.2;Solyc03g044900.2;Solyc03g…	5	0.920027	up,down
561	Glycerolipid metabolism	Solyc01g094700.2;Solyc01g109370.2;Solyc01g007100.2;Solyc03g115370.2;Solyc03g117490.2;Solyc03g063880.2;Solyc04g079880.2;Solyc05g056420.2;Solyc07g005580.2;Solyc07g007620.2;Solyc07g040740.2;Solyc07g056320.2;Solyc08g076470.2;Solyc08g082340.2;Solyc08g006640.2;Solyc09g014300.2;Solyc09g014350.2;Solyc10g017580.2;Solyc10g081900.1;Solyc10g085100.1;Solyc12g039180.1;Solyc12g008970.1;Solyc12g009820.1	1	0.936267	up,down
330	Arginine and proline metabolism	Solyc01g080530.2;Solyc01g091160.2;Solyc01g091170.2;Solyc01g108660.2;Solyc02g064750.2;Solyc02g067530.2;Solyc02g068640.2;Solyc02g083390.2;Solyc02g092710.2;Solyc02g089620.2;Solyc02g089630.2;Solyc03g033320.2;Solyc03g093240.2;Solyc04g080610.2;Solyc04g081930.2;Solyc04g082030.1;Solyc06g054490.2;Solyc06g019170.2;Solyc08g080370.2;Solyc08g043170.2;Solyc08g076990.2;Solyc09g010420.2;Solyc10g054440.1;Solyc11g…	1	0.964983	up,down
270	Cysteine and methionine metabolism	Solyc01g009180.2;Solyc01g094790.2;Solyc01g101060.2;Solyc01g111060.2;Solyc01g095080.2;Solyc02g036350.2;Solyc02g078990.2;Solyc02g081190.2;Solyc02g082850.2;Solyc02g089610.1;Solyc02g091990.2;Solyc03g043890.2;Solyc03g007240.2;Solyc04g026030.2;Solyc05g005710.2;Solyc05g010420.1;Solyc07g063040.2;Solyc07g065470.2;Solyc07g066580.2;Solyc07g026650.2;Solyc07g065340.1;Solyc08g005400.2;Solyc08g008580.2;Solyc08g…	2	0.966007	up,down
4110	Cell cycle	Solyc01g102270.2;Solyc01g104490.2;Solyc01g107160.2;Solyc01g111650.2;Solyc01g008120.2;Solyc01g094760.2;Solyc01g103040.2;Solyc01g111870.1;Solyc02g062680.2;Solyc02g063070.2;Solyc02g079050.2;Solyc03g006420.2;Solyc03g034180.2;Solyc03g113740.2;Solyc04g008610.2;Solyc04g063380.2;Solyc04g082430.2;Solyc04g082900.2;Solyc05g007450.2;Solyc05g007750.2;Solyc05g008540.2;Solyc05g012720.2;Solyc05g026510.2;Solyc06g…	2	0.966007	up,down
4144	Endocytosis	Solyc01g060280.2;Solyc01g096910.2;Solyc01g106050.2;Solyc01g109520.2;Solyc02g080270.2;Solyc03g031750.1;Solyc03g121360.1;Solyc03g119330.2;Solyc04g007560.2;Solyc04g008660.2;Solyc04g081410.2;Solyc05g008430.2;Solyc05g055170.2;Solyc06g061150.2;Solyc06g062510.2;Solyc06g074650.2;Solyc07g063550.2;Solyc07g064980.2;Solyc08g005070.2;Solyc08g065900.2;Solyc08g006960.2;Solyc08g076130.2;Solyc09g098490.2;Solyc09g…	1	0.975554	up,down
500	Starch and sucrose metabolism	Solyc01g079790.2;Solyc01g091200.2;Solyc01g093970.2;Solyc01g110340.2;Solyc01g109790.2;Solyc01g112210.2;Solyc02g081300.2;Solyc02g088000.2;Solyc02g089440.2;Solyc02g020980.2;Solyc02g072150.2;Solyc02g088630.2;Solyc03g065340.2;Solyc03g098290.2;Solyc03g083090.2;Solyc03g095710.2;Solyc03g114810.2;Solyc04g015270.2;Solyc04g025940.2;Solyc04g078930.2;Solyc04g053120.2;Solyc04g064490.2;Solyc05g005750.2;Solyc05g…	2	0.984959	up,down
4120	Ubiquitin mediated proteolysis	Solyc01g005840.2;Solyc01g010820.2;Solyc01g056340.2;Solyc01g095490.2;Solyc01g111530.2;Solyc01g057900.2;Solyc01g079840.2;Solyc01g094810.2;Solyc01g109960.2;Solyc01g111680.2;Solyc02g084760.2;Solyc02g087750.2;Solyc02g087900.2;Solyc02g083570.2;Solyc02g092380.2;Solyc03g044260.2;Solyc03g123660.2;Solyc03g007470.2;Solyc03g019730.2;Solyc03g043870.2;Solyc03g096930.2;Solyc03g113100.2;Solyc04g079970.2;Solyc04g…	1	0.99825	up,down
10	Glycolysis / Gluconeogenesis	Solyc01g049650.2;Solyc01g095470.2;Solyc01g110360.2;Solyc01g100360.2;Solyc01g106010.2;Solyc02g067860.2;Solyc02g087780.2;Solyc02g091830.2;Solyc02g094640.2;Solyc02g062340.2;Solyc02g065080.2;Solyc02g084440.2;Solyc03g006870.2;Solyc03g093520.2;Solyc03g097680.2;Solyc03g111010.2;Solyc03g114150.2;Solyc03g114500.2;Solyc03g007810.2;Solyc03g113030.2;Solyc04g008590.2;Solyc04g014270.2;Solyc04g045340.2;Solyc04g…	2	0.999382	up,down
230	Purine metabolism	Solyc00g009060.2;Solyc01g080940.2;Solyc01g081300.2;Solyc01g086710.2;Solyc01g089970.2;Solyc01g103440.2;Solyc01g080210.2;Solyc01g110520.2;Solyc02g078260.2;Solyc02g094160.1;Solyc02g064650.2;Solyc02g076720.2;Solyc02g078400.2;Solyc02g083350.2;Solyc02g085520.2;Solyc02g086600.2;Solyc02g092410.2;Solyc02g093300.2;Solyc03g063340.2;Solyc03g063600.2;Solyc03g098250.2;Solyc03g121730.2;Solyc03g031690.2;Solyc04g…	1	0.999952	up,down
3040	Spliceosome	Solyc01g057760.2;Solyc01g068480.2;Solyc01g086990.2;Solyc01g094480.2;Solyc01g096520.2;Solyc01g100060.2;Solyc01g100330.2;Solyc01g103020.2;Solyc01g103450.2;Solyc01g106210.2;Solyc01g106260.2;Solyc01g110990.2;Solyc01g067830.2;Solyc01g079250.2;Solyc01g079330.2;Solyc01g094540.2;Solyc01g096600.2;Solyc01g105140.2;Solyc02g062920.2;Solyc02g068190.1;Solyc02g069790.2;Solyc02g078610.2;Solyc02g081290.2;Solyc02g…	1	0.999997	up,down
3010	Ribosome	Solyc00g009100.2;Solyc01g009100.2;Solyc01g009520.2;Solyc01g056940.2;Solyc01g057830.2;Solyc01g066840.2;Solyc01g096290.2;Solyc01g097760.2;Solyc01g097870.2;Solyc01g007280.2;Solyc01g068530.2;Solyc01g091220.2;Solyc01g094560.2;Solyc01g099670.2;Solyc01g103510.2;Solyc01g103800.2;Solyc01g104370.2;Solyc01g104590.2;Solyc02g021400.1;Solyc02g064670.1;Solyc02g068770.2;Solyc02g069850.2;Solyc02g070330.2;Solyc02g…	1	1	up,down
61	Fatty acid biosynthesis	Solyc01g006450.2;Solyc01g006980.2;Solyc01g008330.2;Solyc01g105060.2;Solyc03g063110.2;Solyc03g097470.2;Solyc03g122120.2;Solyc06g053480.2;Solyc06g071060.1;Solyc06g071070.1;Solyc06g083380.2;Solyc06g069530.2;Solyc07g049570.2;Solyc09g013080.2;Solyc10g080890.1;Solyc10g078740.1;Solyc11g008680.1;Solyc12g006930.1;Solyc12g056940.1	0	1	up,down
4146	Peroxisome	Solyc01g067740.2;Solyc01g091900.2;Solyc02g091100.2;Solyc03g062940.2;Solyc03g119030.2;Solyc04g057960.2;Solyc04g080930.2;Solyc05g024240.2;Solyc05g054950.2;Solyc05g052640.2;Solyc06g049080.2;Solyc06g066570.2;Solyc06g071470.2;Solyc06g008730.2;Solyc06g060720.2;Solyc07g066630.2;Solyc10g005650.2;Solyc11g066390.1	0	1	up,down
4012	ErbB signaling pathway	Solyc01g103430.2;Solyc02g086670.2;Solyc12g062870.1	0	1	up,down
591	Linoleic acid metabolism	Solyc01g006540.2;Solyc01g006560.2;Solyc03g122340.2;Solyc05g014790.2;Solyc08g029000.2;Solyc09g075860.2	0	1	up,down
5322	Systemic lupus erythematosus	Solyc01g099410.2;Solyc03g071620.1;Solyc04g011390.1;Solyc04g074580.1;Solyc04g081150.2;Solyc05g051500.2;Solyc05g055440.1;Solyc06g005390.1;Solyc06g074750.1;Solyc06g075800.1;Solyc06g075830.1;Solyc06g084090.2;Solyc06g005420.1;Solyc06g005430.1;Solyc06g074780.1;Solyc06g075930.1;Solyc08g068310.2;Solyc09g010400.2;Solyc09g074300.1;Solyc10g006560.2;Solyc11g066160.1;Solyc11g066430.1;Solyc11g072860.1;Solyc11g…	0	1	up,down
3320	PPAR signaling pathway	Solyc03g071750.2;Solyc11g005670.1;Solyc11g007760.1	0	1	up,down
450	Selenoamino acid metabolism	Solyc01g102940.2;Solyc05g055000.2;Solyc05g054600.2;Solyc07g008950.2;Solyc11g065620.1	0	1	up,down
4710	Circadian rhythm - mammal	Solyc12g042910.1	0	1	down
785	Lipoic acid metabolism	Solyc04g079750.2;Solyc07g054540.2;Solyc12g099700.1	0	1	up,down
680	Methane metabolism	Solyc04g016360.2	0	1	down
4360	Axon guidance	Solyc04g011370.2	0	1	up
510	N-Glycan biosynthesis	Solyc01g005110.2;Solyc01g108110.2;Solyc01g088650.2;Solyc01g089900.2;Solyc01g109410.2;Solyc01g112240.2;Solyc02g070520.2;Solyc02g087290.2;Solyc02g093430.2;Solyc03g005800.2;Solyc03g098600.2;Solyc03g123900.2;Solyc04g082670.2;Solyc04g016520.2;Solyc04g049070.2;Solyc04g082390.2;Solyc05g051630.2;Solyc05g054460.2;Solyc06g066400.2;Solyc06g082490.2;Solyc07g008030.1;Solyc07g045470.1;Solyc07g062540.2;Solyc07g…	0	1	up,down
3060	Protein export	Solyc01g097310.2;Solyc01g080840.2;Solyc01g091580.2;Solyc01g098780.2;Solyc02g062810.2;Solyc02g068390.2;Solyc02g072130.2;Solyc02g070870.2;Solyc03g093970.2;Solyc03g116810.2;Solyc03g116990.1;Solyc04g072110.2;Solyc04g079550.2;Solyc05g008530.2;Solyc05g014050.2;Solyc07g006520.2;Solyc08g082820.2;Solyc08g008320.2;Solyc08g082740.2;Solyc09g009180.2;Solyc09g009940.2;Solyc09g014510.2;Solyc10g007390.2;Solyc11g…	0	1	up,down
531	Glycosaminoglycan degradation	Solyc01g087610.2	0	1	up
430	Taurine and hypotaurine metabolism	Solyc02g087740.2;Solyc05g051780.2;Solyc07g055150.2;Solyc10g007990.2;Solyc12g008640.1	0	1	up,down
4810	Regulation of actin cytoskeleton	Solyc01g080040.2;Solyc03g043720.2	0	1	up
340	Histidine metabolism	Solyc01g103750.2;Solyc02g071890.2;Solyc03g005010.2;Solyc03g121260.2;Solyc04g071140.2;Solyc04g009350.2;Solyc05g056150.2;Solyc09g076020.2;Solyc10g005930.1	0	1	up,down
1040	Biosynthesis of unsaturated fatty acids	Solyc01g094550.2;Solyc01g006430.2;Solyc01g094530.2;Solyc03g116730.2;Solyc04g014370.2;Solyc05g054490.2;Solyc06g051400.2;Solyc06g007130.2;Solyc07g005510.2	0	1	up,down
4062	Chemokine signaling pathway	Solyc01g109560.2	0	1	up
4621	NOD-like receptor signaling pathway	Solyc03g007670.2	0	1	up
5140	Leishmaniasis	Solyc04g079900.2	0	1	down
4340	Hedgehog signaling pathway	Solyc03g121820.2;Solyc05g016410.2;Solyc06g062790.2	0	1	up,down
540	Lipopolysaccharide biosynthesis	Solyc10g083710.1;Solyc10g006980.2;Solyc11g072690.1	0	1	up,down
600	Sphingolipid metabolism	Solyc03g098220.2;Solyc05g015860.2;Solyc05g053740.2;Solyc06g072320.2;Solyc08g066020.1;Solyc10g009030.2	0	1	up,down
905	Brassinosteroid biosynthesis	Solyc02g089160.2;Solyc02g084740.2;Solyc02g085360.2;Solyc10g086500.1	0	1	up,down
4080	Neuroactive ligand-receptor interaction	Solyc04g080980.2;Solyc07g032100.2	0	1	up,down
480	Glutathione metabolism	Solyc01g098610.2;Solyc02g081430.2;Solyc06g009020.2;Solyc06g069040.2;Solyc06g073460.2;Solyc08g080940.2;Solyc08g006720.2;Solyc08g081010.2;Solyc08g081250.2;Solyc09g064850.2;Solyc09g010560.1;Solyc09g065900.2;Solyc09g091840.2;Solyc12g010040.1;Solyc12g056240.1	0	1	up,down
3420	Nucleotide excision repair	Solyc01g099310.2;Solyc02g067670.2;Solyc02g021470.2;Solyc02g021650.2;Solyc02g063130.2;Solyc02g085840.2;Solyc03g115580.2;Solyc03g117780.2;Solyc04g071310.2;Solyc04g072880.2;Solyc06g062940.2;Solyc06g008970.2;Solyc08g077800.2;Solyc08g079610.2;Solyc08g081280.2;Solyc08g081340.2;Solyc09g031610.2;Solyc09g066480.2;Solyc11g011150.1;Solyc12g009120.1;Solyc12g088340.1	0	1	up,down
52	Galactose metabolism	Solyc01g058390.2;Solyc02g069670.2;Solyc03g121680.1;Solyc03g019790.2;Solyc03g083910.2;Solyc04g008730.2;Solyc06g050130.2;Solyc06g062660.2;Solyc07g014640.2;Solyc08g082440.2;Solyc08g014480.2;Solyc08g080570.2;Solyc09g010080.2;Solyc10g050850.1;Solyc10g083290.1;Solyc10g083300.1;Solyc12g008840.1;Solyc12g055930.1	0	1	up,down
100	Steroid biosynthesis	Solyc00g085070.2;Solyc01g008110.2;Solyc01g009310.2;Solyc01g087560.2;Solyc01g110290.2;Solyc01g111830.2;Solyc02g063240.2;Solyc02g070580.1;Solyc02g086180.2;Solyc02g030170.2;Solyc02g069490.2;Solyc04g070980.2;Solyc04g077440.2;Solyc06g074090.2;Solyc06g082980.2;Solyc09g009040.2;Solyc10g055680.1;Solyc12g098640.1	0	1	up,down
300	Lysine biosynthesis	Solyc01g081050.2;Solyc01g098380.2;Solyc01g109850.2;Solyc03g026210.2;Solyc03g044660.2;Solyc06g073280.2;Solyc09g005700.2	0	1	up,down
564	Glycerophospholipid metabolism	Solyc01g091950.2;Solyc01g065720.2;Solyc01g091910.2;Solyc01g104880.2;Solyc02g068360.2;Solyc03g118750.2;Solyc03g005410.2;Solyc04g007520.2;Solyc04g009580.2;Solyc04g054400.2;Solyc04g080020.2;Solyc04g049550.2;Solyc05g008580.2;Solyc06g068090.2;Solyc06g069470.2;Solyc06g060780.2;Solyc08g066800.2;Solyc08g080130.2;Solyc09g083330.2;Solyc10g005290.2	0	1	up,down
4112	Cell cycle - Caulobacter	Solyc01g007490.2;Solyc01g100520.2;Solyc02g091280.2;Solyc03g083250.2;Solyc04g009310.2;Solyc07g065050.2;Solyc08g077890.2;Solyc08g079620.2;Solyc08g077440.2;Solyc10g051310.1	0	1	up,down
280	Valine, leucine and isoleucine degradation	Solyc01g028900.2;Solyc01g066520.2;Solyc01g080930.2;Solyc01g106080.2;Solyc01g108030.2;Solyc02g022930.2;Solyc02g091970.2;Solyc03g043880.2;Solyc04g063350.2;Solyc05g056480.2;Solyc06g059850.1;Solyc06g073560.2;Solyc07g021630.2;Solyc08g078130.2;Solyc09g065540.2;Solyc10g085630.1;Solyc11g069180.1;Solyc11g071280.1;Solyc12g011160.1	0	1	up,down
5110	Vibrio cholerae infection	Solyc02g072120.2;Solyc09g091900.2	0	1	up,down
4622	RIG-I-like receptor signaling pathway	Solyc01g005960.2;Solyc01g110530.2;Solyc02g062250.2;Solyc03g052980.2	0	1	up,down
740	Riboflavin metabolism	Solyc01g094500.2;Solyc02g079100.2;Solyc07g054190.2;Solyc12g096590.1	0	1	up
410	beta-Alanine metabolism	Solyc09g061680.2	0	1	up
830	Retinol metabolism	Solyc04g014670.2	0	1	up
920	Sulfur metabolism	Solyc02g079250.2;Solyc02g079270.2;Solyc02g078860.2;Solyc02g094120.2;Solyc12g013560.1	0	1	up,down
603	Glycosphingolipid biosynthesis - globo series	Solyc02g078590.1;Solyc10g076780.1	0	1	down
4140	Regulation of autophagy	Solyc01g006230.2;Solyc02g036380.2;Solyc04g012170.2;Solyc06g034160.2;Solyc08g007400.2;Solyc09g011320.2;Solyc10g084930.1;Solyc11g068930.1;Solyc12g049310.1	0	1	up,down
40	Pentose and glucuronate interconversions	Solyc00g027770.2;Solyc02g067080.2;Solyc02g093580.2;Solyc03g111690.2;Solyc03g115380.1;Solyc03g071570.2;Solyc03g123630.2;Solyc04g010230.2;Solyc04g015530.1;Solyc04g077040.2;Solyc06g009200.2;Solyc06g069550.1;Solyc06g071020.2;Solyc06g083580.2;Solyc06g084620.1;Solyc07g017600.2;Solyc07g006650.2;Solyc08g060970.2;Solyc09g061890.2;Solyc09g091430.2;Solyc11g008140.1;Solyc11g011960.1;Solyc12g008530.1	0	1	up,down
4712	Circadian rhythm - plant	Solyc01g005300.2;Solyc01g097840.2;Solyc01g102300.2;Solyc01g059870.2;Solyc02g071260.2;Solyc02g089500.2;Solyc03g081240.2;Solyc03g115770.2;Solyc04g074180.2;Solyc04g071990.2;Solyc08g065870.2;Solyc09g076000.2;Solyc09g090100.2;Solyc10g005080.2;Solyc10g044670.1;Solyc10g086000.1;Solyc12g056650.1	0	1	up,down
350	Tyrosine metabolism	Solyc09g064430.2;Solyc11g012160.1	0	1	up,down
260	Glycine, serine and threonine metabolism	Solyc01g005240.2;Solyc01g098550.2;Solyc01g104000.2;Solyc01g005250.2;Solyc02g082830.1;Solyc02g091560.2;Solyc02g080810.2;Solyc03g123830.2;Solyc03g112070.2;Solyc03g113800.2;Solyc03g121910.1;Solyc04g008760.1;Solyc04g076790.2;Solyc05g013440.2;Solyc05g053810.2;Solyc06g064550.2;Solyc06g076510.2;Solyc06g062840.2;Solyc06g071290.2;Solyc07g064280.2;Solyc08g065220.2;Solyc08g008010.2;Solyc08g065490.2;Solyc10g…	0	1	up,down
30	Pentose phosphate pathway	Solyc00g006800.2;Solyc02g093830.2;Solyc02g069620.2;Solyc03g082580.2;Solyc03g115820.2;Solyc04g005160.1;Solyc05g008370.1;Solyc05g050970.2;Solyc05g007260.2;Solyc05g012110.2;Solyc05g015950.2;Solyc07g045540.2;Solyc07g062070.2;Solyc07g066270.2;Solyc08g077200.2;Solyc08g079070.2;Solyc10g006600.2;Solyc10g018300.1;Solyc10g024410.1;Solyc12g056120.1	0	1	up,down
3440	Homologous recombination	Solyc01g008520.2;Solyc01g068340.2;Solyc01g103960.2;Solyc02g050200.1;Solyc05g053800.2;Solyc05g055780.2;Solyc07g055170.1;Solyc07g017540.2;Solyc09g097880.2;Solyc09g009340.1;Solyc11g072610.1	0	1	up,down
563	Glycosylphosphatidylinositol(GPI)-anchor biosynthesis	Solyc00g007090.2;Solyc01g006000.2;Solyc02g067820.2;Solyc02g081610.1;Solyc02g083260.2;Solyc07g006330.1;Solyc08g076570.2;Solyc08g082840.1;Solyc09g059960.2;Solyc11g010550.1	0	1	up,down
550	Peptidoglycan biosynthesis	Solyc03g118860.2	0	1	down
4666	Fc gamma R-mediated phagocytosis	Solyc01g090450.2;Solyc05g006470.2;Solyc07g007630.2;Solyc09g090550.2;Solyc11g068610.1;Solyc12g098430.1	0	1	up,down
4150	mTOR signaling pathway	Solyc03g005870.2;Solyc05g054130.2;Solyc09g014780.2;Solyc10g080660.1;Solyc11g012400.1	0	1	up,down
2010	ABC transporters	Solyc02g071350.2;Solyc09g055350.2	0	1	up
5416	Viral myocarditis	Solyc01g088700.2;Solyc07g005810.2	0	1	down
3430	Mismatch repair	Solyc01g079520.2;Solyc02g071530.1;Solyc02g082660.2;Solyc02g078390.2;Solyc03g025890.1;Solyc04g045660.2;Solyc06g069230.2	0	1	up,down
592	alpha-Linolenic acid metabolism	Solyc02g085730.2;Solyc02g087070.2;Solyc04g079730.1;Solyc07g007870.2;Solyc07g019670.2;Solyc07g049690.2;Solyc10g086220.1;Solyc11g032130.1;Solyc11g069800.1;Solyc12g007170.1;Solyc12g099440.1;Solyc12g094520.1	0	1	up,down
960	Tropane, piperidine and pyridine alkaloid biosynthesis	Solyc03g096640.2;Solyc06g005720.2	0	1	up,down
4010	MAPK signaling pathway	Solyc01g094960.2;Solyc03g117470.2;Solyc04g080730.2;Solyc05g049970.2;Solyc05g018300.2;Solyc06g005170.2;Solyc07g065820.2;Solyc07g055860.2;Solyc08g077770.2;Solyc08g081490.2;Solyc11g072630.1;Solyc12g015870.1;Solyc12g009020.1	0	1	up,down
4722	Neurotrophin signaling pathway	Solyc04g014760.2;Solyc11g012270.1	0	1	up
562	Inositol phosphate metabolism	Solyc01g008790.2;Solyc01g104140.2;Solyc01g107750.2;Solyc03g123570.2;Solyc03g019670.2;Solyc04g015350.2;Solyc04g077120.2;Solyc05g052760.2;Solyc05g056490.2;Solyc06g007120.2;Solyc06g051630.2;Solyc08g076690.1;Solyc08g005130.1;Solyc08g005990.2;Solyc09g020190.2;Solyc09g008480.2;Solyc11g005910.1;Solyc11g013180.1;Solyc12g049590.1;Solyc12g088200.1	0	1	up,down
942	Anthocyanin biosynthesis	Solyc09g092500.1	0	1	down
770	Pantothenate and CoA biosynthesis	Solyc03g112910.2;Solyc08g080920.2;Solyc09g007130.2;Solyc11g013460.1;Solyc12g056840.1	0	1	up
900	Terpenoid backbone biosynthesis	Solyc01g009010.2;Solyc01g098840.2;Solyc01g109300.2;Solyc01g067890.2;Solyc01g102820.2;Solyc02g082260.2;Solyc03g025560.2;Solyc03g114340.2;Solyc04g009650.2;Solyc04g056390.2;Solyc05g055760.2;Solyc06g060810.2;Solyc07g061990.2;Solyc08g076140.2;Solyc08g081570.2;Solyc09g008920.2;Solyc10g085150.1;Solyc11g007020.1;Solyc11g069380.1;Solyc12g015860.1	0	1	up,down
906	Carotenoid biosynthesis	Solyc01g009230.2;Solyc01g088170.2;Solyc01g108210.2;Solyc01g097810.2;Solyc02g081330.2;Solyc02g090890.2;Solyc03g031860.2;Solyc03g123760.2;Solyc04g078900.2;Solyc04g040190.1;Solyc04g050930.2;Solyc04g071940.2;Solyc05g053530.1;Solyc06g036260.2;Solyc07g056570.1;Solyc08g016720.1;Solyc08g075320.2;Solyc10g079480.1;Solyc10g083790.1;Solyc10g081650.1;Solyc11g071600.1;Solyc11g071620.1	0	1	up,down
440	Phosphonate and phosphinate metabolism	Solyc00g059500.1;Solyc05g010440.1;Solyc10g074700.1	0	1	up
590	Arachidonic acid metabolism	Solyc04g049720.2	0	1	down
4310	Wnt signaling pathway	Solyc01g088740.2;Solyc02g092640.2;Solyc02g064700.2;Solyc03g044140.2;Solyc06g061000.2;Solyc06g053560.2;Solyc06g062350.2;Solyc06g083830.2;Solyc08g016670.2;Solyc10g081230.1;Solyc11g069370.1	0	1	up,down
71	Fatty acid metabolism	Solyc01g066310.2;Solyc01g079240.2;Solyc01g099100.2;Solyc01g059830.2;Solyc01g109180.2;Solyc04g015100.2;Solyc04g054890.2;Solyc05g017760.2;Solyc05g018410.1;Solyc05g054370.2;Solyc07g045290.2;Solyc07g045350.2;Solyc08g078390.2;Solyc08g082280.2;Solyc09g091470.2;Solyc09g092450.2;Solyc10g008110.2;Solyc10g085200.1;Solyc10g076600.1;Solyc11g018580.1;Solyc12g009040.1	0	1	up,down
5010	Alzheimer's disease	Solyc04g015680.2;Solyc11g072460.1;Solyc12g005870.1	0	1	up,down
902	Monoterpenoid biosynthesis	Solyc01g105890.2;Solyc02g079840.1	0	1	up
400	Phenylalanine, tyrosine and tryptophan biosynthesis	Solyc01g067750.2;Solyc01g091190.2;Solyc02g076760.2;Solyc02g083590.2;Solyc02g088460.2;Solyc03g111850.2;Solyc04g051860.2;Solyc04g074480.2;Solyc04g009620.2;Solyc04g049350.2;Solyc05g050980.2;Solyc06g006100.2;Solyc06g071550.2;Solyc06g051410.2;Solyc11g009080.1;Solyc11g017240.1;Solyc12g010180.1	0	1	up,down
53	Ascorbate and aldarate metabolism	Solyc01g008830.1;Solyc01g097340.2;Solyc01g005510.2;Solyc01g106450.2;Solyc01g111510.2;Solyc02g083620.2;Solyc02g086710.2;Solyc03g063150.2;Solyc04g014800.2;Solyc06g005160.2;Solyc06g060260.2;Solyc06g005150.2;Solyc06g062430.2;Solyc08g059760.2;Solyc09g007270.2;Solyc09g009390.2;Solyc09g082990.2;Solyc10g079470.2;Solyc11g012410.1;Solyc11g018550.2;Solyc11g062440.1	0	1	up,down
944	Flavone and flavonol biosynthesis	Solyc03g080180.2;Solyc10g083440.1	0	1	down
62	Fatty acid elongation in mitochondria	Solyc08g078250.2;Solyc11g072640.1	0	1	up,down
940	Phenylpropanoid biosynthesis	Solyc01g107590.2;Solyc02g084570.2;Solyc02g085660.1;Solyc03g117600.2;Solyc04g077630.2;Solyc04g077650.2;Solyc06g068440.2;Solyc11g011330.1;Solyc11g011340.1;Solyc12g007030.1	0	1	up,down
970	Aminoacyl-tRNA biosynthesis	Solyc01g096870.2;Solyc01g098880.2;Solyc01g102800.2;Solyc01g109360.2;Solyc01g111990.2;Solyc01g005540.2;Solyc01g008310.2;Solyc01g106740.2;Solyc02g090860.2;Solyc03g019940.2;Solyc03g097290.2;Solyc03g117330.2;Solyc03g119280.2;Solyc04g076390.2;Solyc05g005800.2;Solyc05g009220.2;Solyc05g009190.2;Solyc05g056250.2;Solyc05g056260.2;Solyc06g068320.2;Solyc06g073330.2;Solyc07g008530.1;Solyc07g048080.2;Solyc08g…	0	1	up,down
4330	Notch signaling pathway	Solyc06g016760.1;Solyc11g011480.1	0	1	up,down
4962	Vasopressin-regulated water reabsorption	Solyc01g066590.2;Solyc01g104920.2	0	1	up,down
730	Thiamine metabolism	Solyc02g091900.2;Solyc05g053480.2;Solyc06g006080.2;Solyc09g074970.2	0	1	up,down
3030	DNA replication	Solyc01g079500.2;Solyc01g102370.2;Solyc01g020440.2;Solyc01g088380.1;Solyc01g110130.2;Solyc02g082180.2;Solyc02g069070.2;Solyc02g070780.2;Solyc02g077740.2;Solyc05g025590.2;Solyc06g060150.2;Solyc06g076660.2;Solyc07g005020.2;Solyc07g005880.2;Solyc07g018300.2;Solyc07g053690.2;Solyc08g075840.2;Solyc08g080510.2;Solyc10g081830.1;Solyc10g008190.2;Solyc11g006860.1;Solyc11g012820.1;Solyc11g040120.1;Solyc11g…	0	1	up,down
5020	Prion diseases	Solyc08g079170.2	0	1	up
4113	Meiosis - yeast	Solyc02g067980.2;Solyc05g014340.2;Solyc06g030490.2;Solyc06g053630.2;Solyc06g065690.2;Solyc06g076430.2;Solyc07g065430.2;Solyc09g007210.2;Solyc09g008400.2;Solyc09g082790.2;Solyc10g083920.1	0	1	up,down
3450	Non-homologous end-joining	Solyc01g091350.2;Solyc06g053770.2;Solyc09g098230.2	0	1	up,down
72	Synthesis and degradation of ketone bodies	Solyc11g065070.1;Solyc12g056450.1	0	1	up,down
240	Pyrimidine metabolism	Solyc01g079650.2;Solyc01g100030.2;Solyc01g088480.2;Solyc02g082190.2;Solyc02g082250.2;Solyc03g032000.2;Solyc03g078080.2;Solyc03g083610.2;Solyc03g115630.2;Solyc03g097910.2;Solyc03g111350.2;Solyc06g065580.2;Solyc06g075340.2;Solyc07g065890.2;Solyc07g021750.1;Solyc07g048010.2;Solyc09g011300.2;Solyc10g005880.2;Solyc10g047630.1;Solyc10g080080.1;Solyc11g064920.1;Solyc11g068830.1;Solyc11g006350.1	0	1	up,down
130	Ubiquinone and other terpenoid-quinone biosynthesis	Solyc01g105460.2;Solyc01g081470.2;Solyc02g088710.2;Solyc03g005230.2;Solyc03g051810.2;Solyc03g114300.2;Solyc03g097030.2;Solyc03g117870.2;Solyc04g049290.1;Solyc05g005180.2;Solyc05g041200.2;Solyc06g068650.2;Solyc07g008360.1;Solyc07g017770.2;Solyc07g053720.2;Solyc07g055850.2;Solyc08g068570.2;Solyc08g076360.2;Solyc09g091570.2;Solyc10g007110.2;Solyc11g069050.1;Solyc12g019010.1	0	1	up,down
760	Nicotinate and nicotinamide metabolism	Solyc01g008560.2;Solyc02g093290.2;Solyc03g044430.2;Solyc03g112060.2;Solyc05g008180.2;Solyc06g075080.2;Solyc07g065590.2;Solyc08g082830.2	0	1	up,down
3050	Proteasome	Solyc01g099760.2;Solyc01g008370.2;Solyc01g109940.2;Solyc01g111710.2;Solyc02g070510.2;Solyc02g081700.1;Solyc02g083710.2;Solyc02g084920.2;Solyc02g089820.2;Solyc03g123730.2;Solyc04g009410.2;Solyc04g012040.2;Solyc04g024420.2;Solyc04g051370.2;Solyc04g079200.2;Solyc04g080590.2;Solyc05g013030.1;Solyc05g053650.2;Solyc05g013820.2;Solyc05g018570.2;Solyc05g018590.2;Solyc05g053140.2;Solyc05g056160.2;Solyc06g…	0	1	up,down
4530	Tight junction	Solyc11g008340.1	0	1	down
3020	RNA polymerase	Solyc03g007370.2;Solyc08g065970.2	0	1	down
5014	Amyotrophic lateral sclerosis (ALS)	Solyc06g007710.2;Solyc06g082800.2	0	1	up
51	Fructose and mannose metabolism	Solyc01g006510.2;Solyc01g096160.2;Solyc02g084210.1;Solyc02g063220.2;Solyc02g081160.2;Solyc02g091490.2;Solyc03g096730.2;Solyc03g118270.1;Solyc03g006860.2;Solyc04g082880.2;Solyc05g048760.2;Solyc06g051270.2;Solyc06g082150.2;Solyc06g060100.2;Solyc06g073190.2;Solyc07g006070.1;Solyc07g049280.2;Solyc08g008670.2;Solyc09g011220.2;Solyc12g095760.1	0	1	up,down
5130	Pathogenic Escherichia coli infection	Solyc02g014310.2	0	1	up
780	Biotin metabolism	Solyc06g034150.2;Solyc06g073470.2;Solyc07g006810.2	0	1	up,down
632	Benzoate degradation via CoA ligation	Solyc07g063010.2	0	1	up
670	One carbon pool by folate	Solyc02g091290.2;Solyc04g071700.2;Solyc11g008870.1	0	1	up,down
904	Diterpenoid biosynthesis	Solyc01g080900.2;Solyc04g083160.1;Solyc06g084240.1;Solyc07g061730.2;Solyc07g056670.2;Solyc07g066670.2;Solyc11g072310.1	0	1	up,down
750	Vitamin B6 metabolism	Solyc02g091340.2;Solyc03g120090.1;Solyc06g081980.1;Solyc11g069290.1	0	1	up,down
351	1,1,1-Trichloro-2,2-bis(4-chlorophenyl)ethane (DDT)	Solyc04g080550.2	0	1	down
4612	Antigen processing and presentation	Solyc03g007890.2;Solyc07g065840.2;Solyc12g015880.1	0	1	up,down
4060	Cytokine-cytokine receptor interaction	Solyc11g039520.1	0	1	down
3018	RNA degradation	Solyc01g090780.2;Solyc01g100850.2;Solyc01g095480.2;Solyc01g103080.2;Solyc02g082460.2;Solyc03g117030.1;Solyc03g059010.2;Solyc04g081280.2;Solyc04g049010.2;Solyc04g050480.2;Solyc05g053470.2;Solyc05g056110.2;Solyc06g005990.2;Solyc06g062980.2;Solyc06g075590.2;Solyc06g005600.2;Solyc06g073700.2;Solyc06g075390.2;Solyc06g084350.2;Solyc07g008750.2;Solyc07g041080.2;Solyc07g065950.2;Solyc07g007890.2;Solyc07g…	0	1	up,down
