# Supplementary material for: Transcriptomic Analysis Reveals Possible Influences of ABA on Secondary Metabolism of Pigments, Flavonoids and Antioxidants in Tomato Fruit during Ripening
Source: PLoS One. 2015 Jun 8;10(6):e0129598. doi: 10.1371/journal.pone.0129598 (PMC4460000; doi:10.1371/journal.pone.0129598)
Supplement: S18 Table — The relative expression data presented in the table are means ± SE of three biological replicates. (XLS) [file pone.0129598.s022.xls]

## Sheet: Table S18
Table S18 Comparison between the results of qRT-PCR and RNA-seq.
NO	Seq ID	Primers used for qRT-PCR		RNA-Seq Quantity			qRT-PCR Quantity
		Primer F	Primer R	CK	ABA	NDGA	CK	ABA	NDGA
1	Solyc03g031860.2	GGTGAAGAGGCAACTGAG	TCGGGAGTCATTAGCATAGT	2277.9	2951.38	1767.95	1.00 ± 0.04	2.48 ± 0.17	0.53 ± 0.05
2	Solyc10g077040.1	CTGCCGTTCACAGTTAGA	GTTGAAAAGGGTCTCCAT	20.5302	9.58535	48.2102	1.00 ± 0.03	0.27 ± 0.01	1.26 ± 0.01
3	Solyc05g047530.2	ACTTCCTCTATGCCAACA	GGACCCGAGTTTGAGTAA	24.6978	33.6301	7.70848	1.00 ± 0.02	6.68 ± 0.29	0.78 ± 0.04
4	Solyc03g117870.2	AGCATAAAGTGACGATTGG	CATTCCATAACCCTGACC	143.203	184.912	105.683	1.00 ± 0.04	3.06 ± 0.91	0.80 ± 0.05
5	Solyc07g056440.2	TAGCAGGCGACGAAAGCG	AATCCAACAAAATCAACTCATC	1388.37	2573.53	347.069	1.00 ± 0.05	14.49 ± 2.38	0.86 ± 0.02
6	Solyc08g080940.2	TAATCTTCCTGTTTCGTC	CTTAGCATCCTTGACAGT	335.019	514.263	271.653	1.00 ± 0.02	4.92 ± 0.37	0.86 ± 0.15
7	Solyc06g054260.1	CAGTAACCCGACCTATCC	CTTCCACTTGGGCTTTTC	133.61	26.7886	336.244	1.00 ± 0.03	0.22 ± 0.10	4.10 ± 0.33
8	Solyc02g069450.2	ACTTGAACGGAGACCTTA	AACATTAAACAGCGAACT	57.5951	19.1817	105.017	1.00 ± 0.02	0.86 ± 0.17	1.91 ± 0.01
9	Solyc03g005760.1	TTTCCTCCTCTACCTTCG	CAGTGTCCCATCCGTAAT	21.8385	1.3494	69.3098	1.00 ± 0.06	0.12 ± 0.05	4.36 ± 0.98
10	Solyc05g041200.2	GCGGTTTGTGAGTCTTGTT	AAATGCCTTGATGTAGTCC	267.64	242.187	185.909	1.00 ± 0.04	0.89 ± 0.12	0.90 ± 0.08
11	Solyc03g123760.2	CTGGAGGCAAGGGATGTT	TAAAGGAGCGGGTAAAGC	44.4965	58.7438	38.5299	1.00 ± 0.05	2.27 ± 0.15	0.99 ± 0.27
12	Solyc01g088090.2	GTATCGCAGAGGTGCTTAA	TTCCCGTAAATGAGACAGA	45.7793	64.0632	41.4583	1.00 ± 0.02	3.86 ± 0.25	0.99 ± 0.13
13	Solyc11g066440.1	TGATAAGCCTGAGTTTGC	GAGTAACAAGGTGCGACA	62.3116	67.6125	51.7397	1.00 ± 0.03	4.01 ± 0.68	1.00 ± 0.26
14	Solyc09g011510.2	AAGTCCCAGTGCTCATTCA	ACCACCGTAACCACCTTGT	8.95299	18.5326	4.11149	1.00 ± 0.02	8.41 ± 1.23	0.52 ± 0.03
15	Solyc07g056470.2	TTAGTGTTGACCGACCAG	ACCTCATTGTTAGCCATT	9.02993	25.2256	3.85434	1.00 ± 0.04	8.38 ± 0.97	0.49 ± 0.05
16	Solyc02g090030.2	CTTCAAGCCAGGCAAATAC	CAAACGGTCCCTCAATCTC	42.554	8.02116	114.689	1.00 ± 0.03	0.09 ± 0.01	3.69 ± 0.82
